# Supplementary material for: Two New Guaiane Sesquiterpenoids from Daphne holosericea (Diels) Hamaya
Source: PubMed Central journal article supplement (PMC6271883; doi:10.3390/molecules190914266), 2014-09-11
Supplement: molecules-19-14266-s001.pdf [file molecules-19-14266-s001.pdf]

# Supplementary Materials

Figure S1.  $^1\text{H-NMR}$  spectrum of compound **1** in  $\text{CDCl}_3$ .

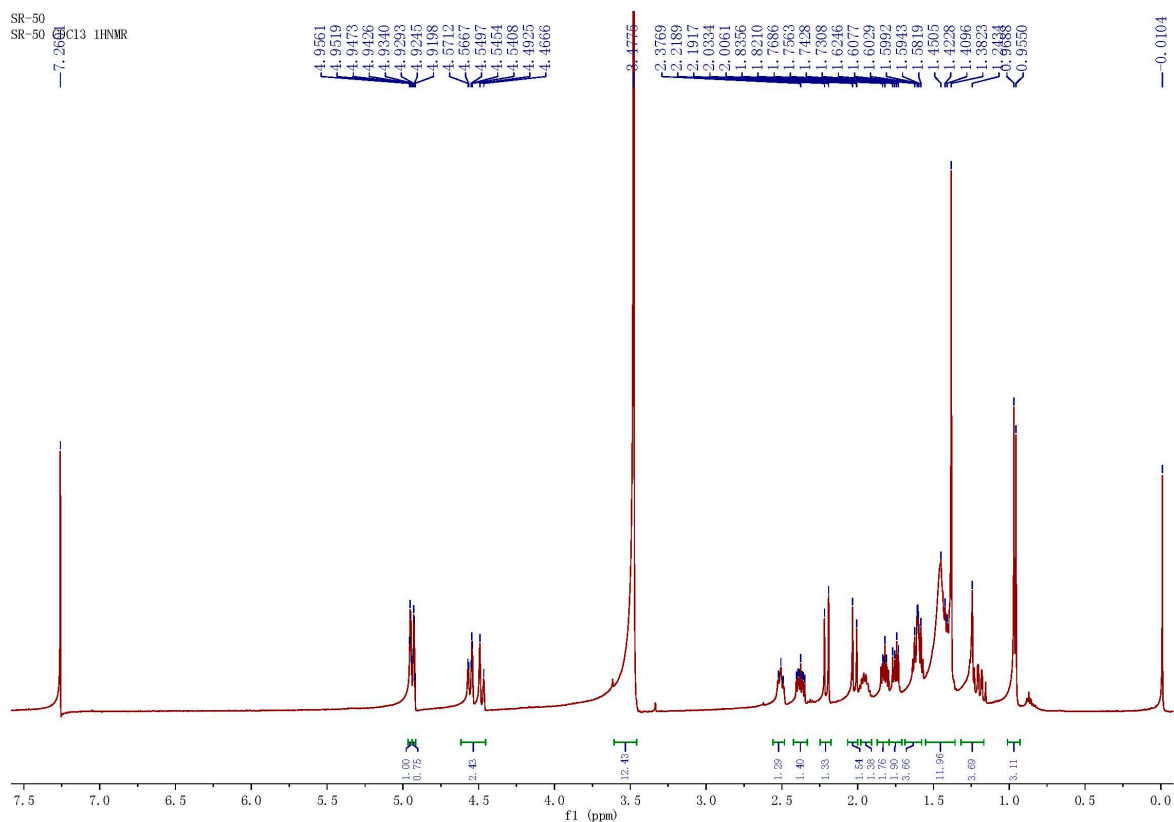

Figure S2.  $^{13}\text{C-NMR}$  and DEPT spectrum of compound **1** in  $\text{CDCl}_3$ .

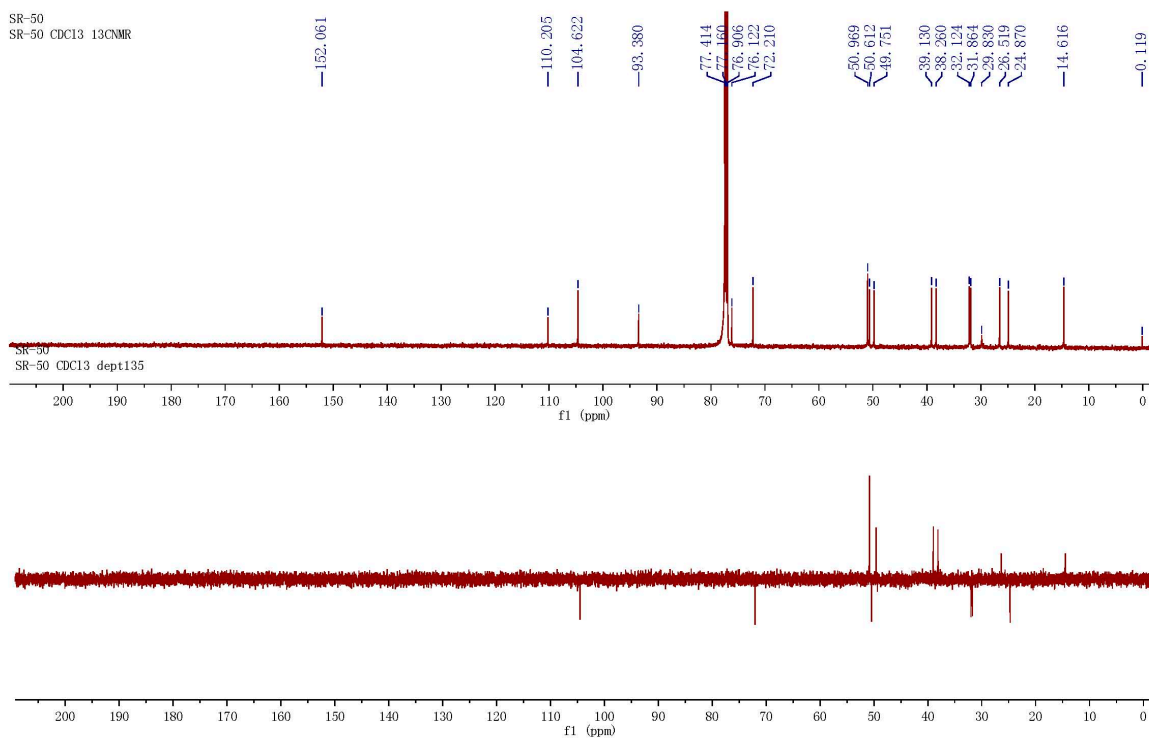

**Figure S3.** HSQC spectrum of compound **1** in CDCl<sub>3</sub>.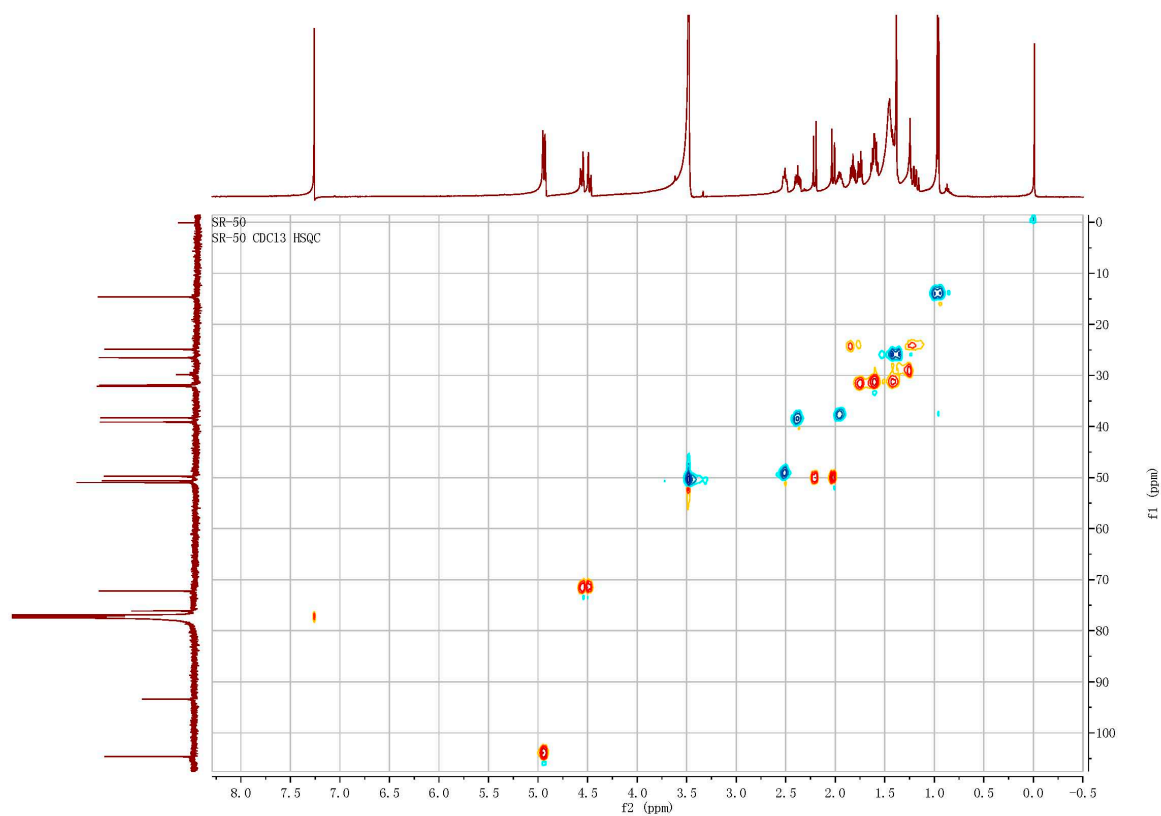**Figure S4.** HMBC spectrum of compound **1** in CDCl<sub>3</sub>.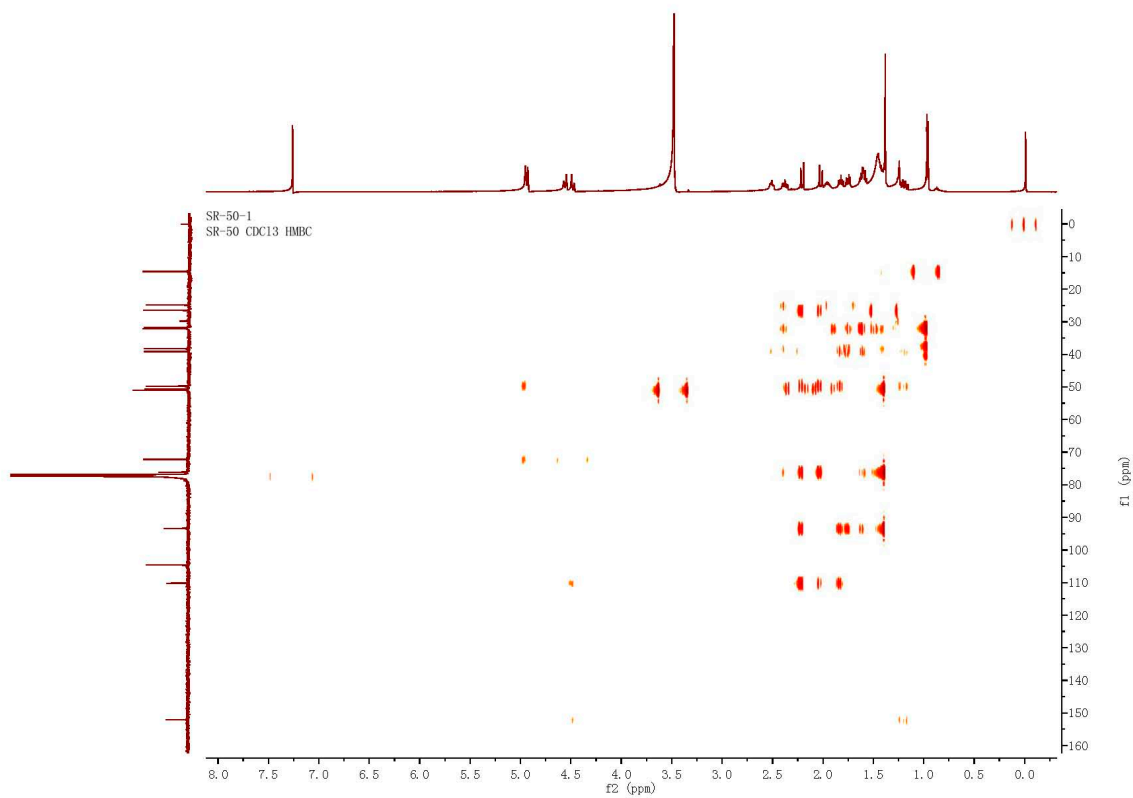

**Figure S5.**  $^1\text{H}$ - $^1\text{H}$  COSY spectrum of compound **1** in  $\text{CDCl}_3$ .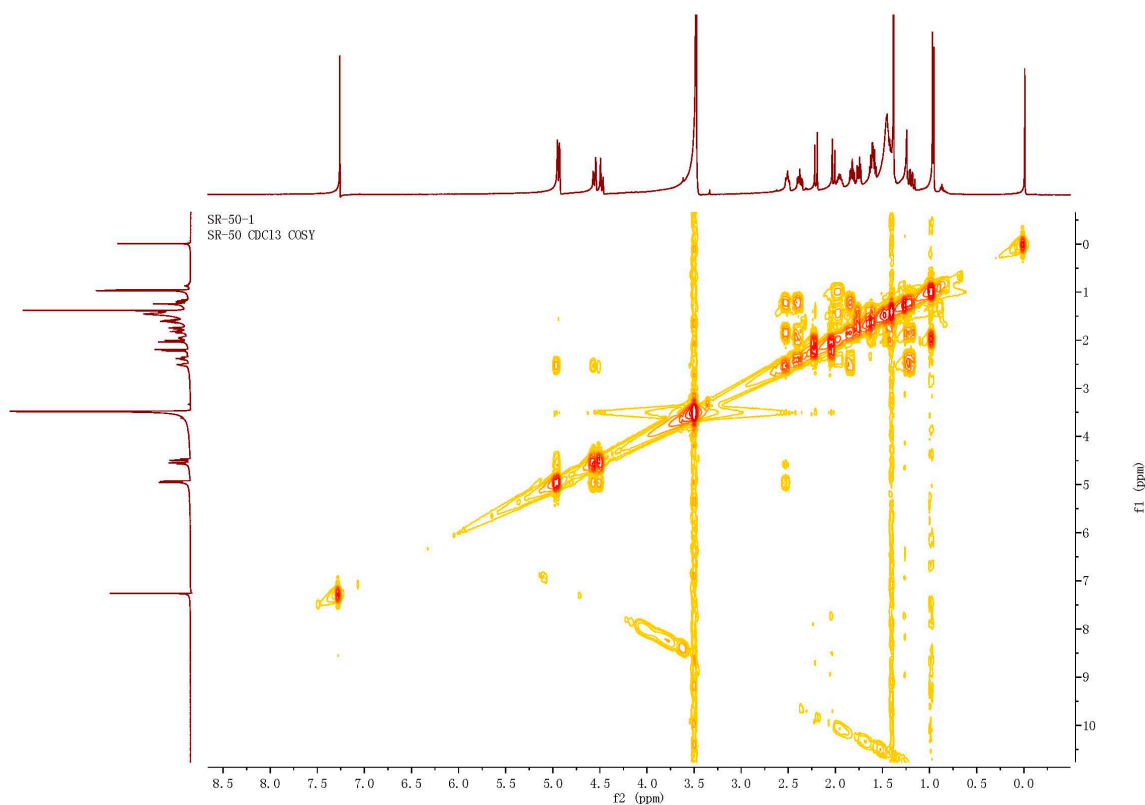**Figure S6.** ROESY spectrum of compound **1** in  $\text{CDCl}_3$ .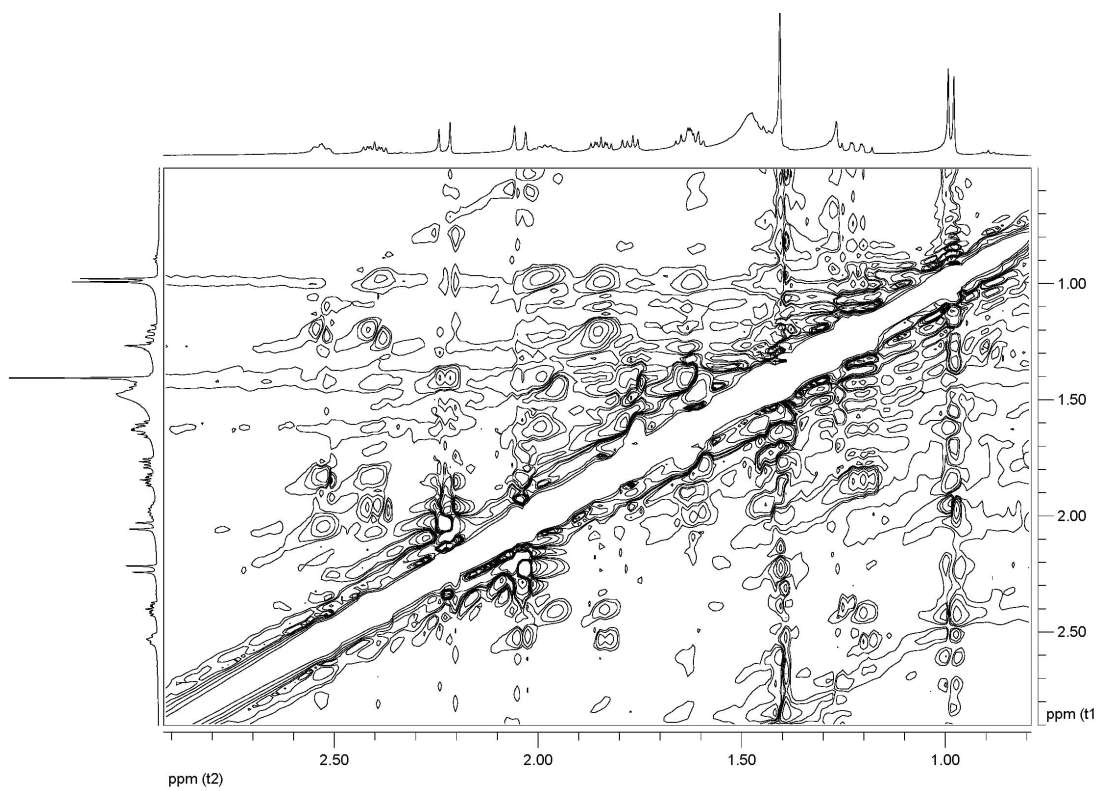

Figure S7. HREIMS spectrum of compound 1 in CHCl<sub>3</sub>.

## Elemental Composition Report

Page 1

## Single Mass Analysis

Tolerance = 10.0 PPM / DBE: min = -10.0, max = 120.0  
 Selected filters: None

## Monoisotopic Mass, Odd and Even Electron Ions

13 formula(e) evaluated with 1 results within limits (up to 51 closest results for each mass)

## Elements Used:

C: 0-200 H: 0-400 O: 2-4

SR-50

11:08:52 02-Aug-2013

Voltage EI+

KIB  
 M130802EA-10AFAMM 7 (0.643)  
 250.1567

Autospec Premier  
 P776  
 199

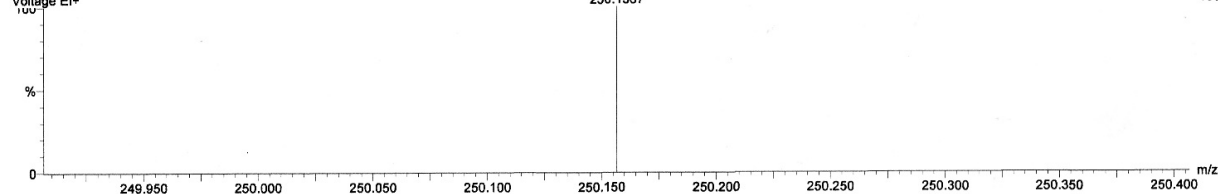

| Mass     | Calc. Mass | mDa  | PPM  | DBE | i-FIT     | Formula    |
|----------|------------|------|------|-----|-----------|------------|
| 250.1567 | 250.1569   | -0.2 | -0.8 | 5.0 | 5546105.0 | C15 H22 O3 |

Figure S8. <sup>1</sup>H-NMR spectrum of compound 2 in CDCl<sub>3</sub>.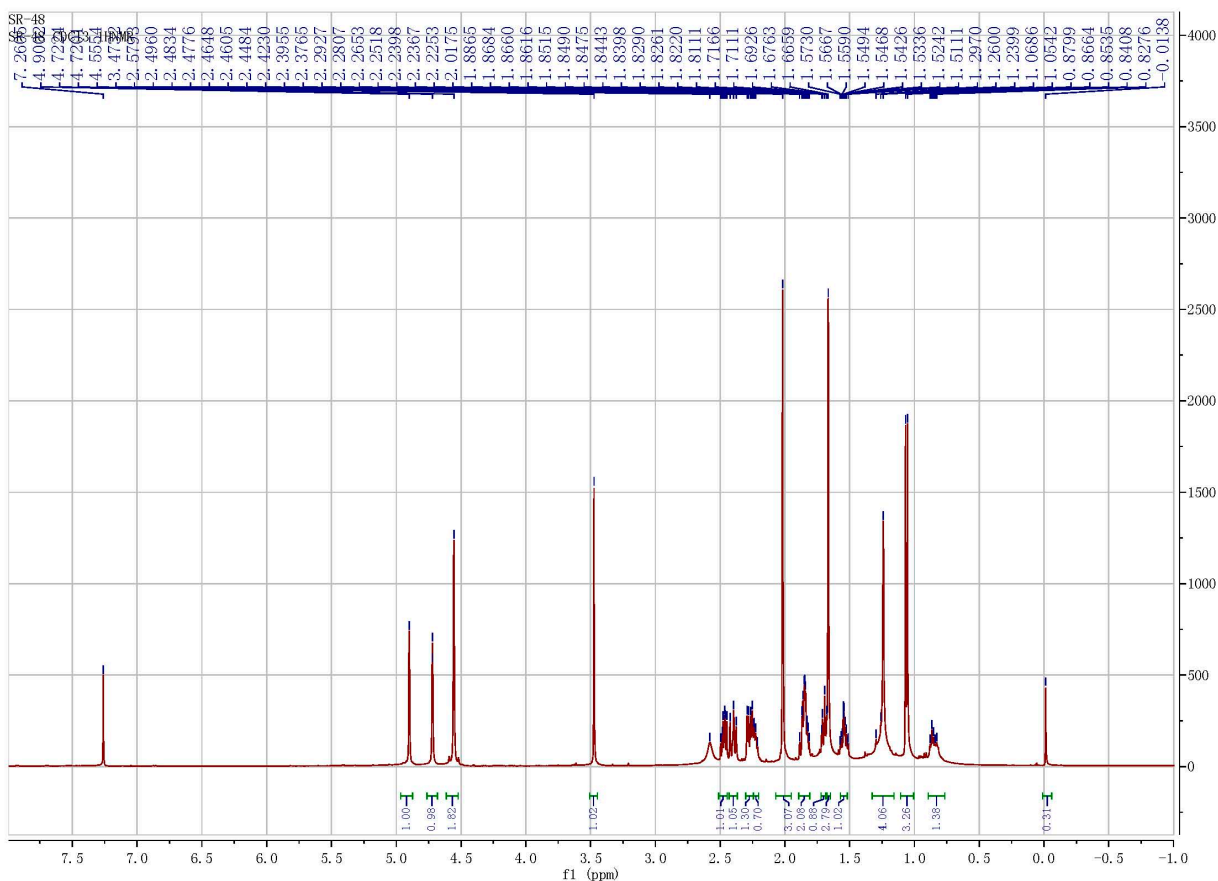

**Figure S9.**  $^{13}\text{C}$ -NMR and DEPT spectrum of compound **2** in  $\text{CDCl}_3$ .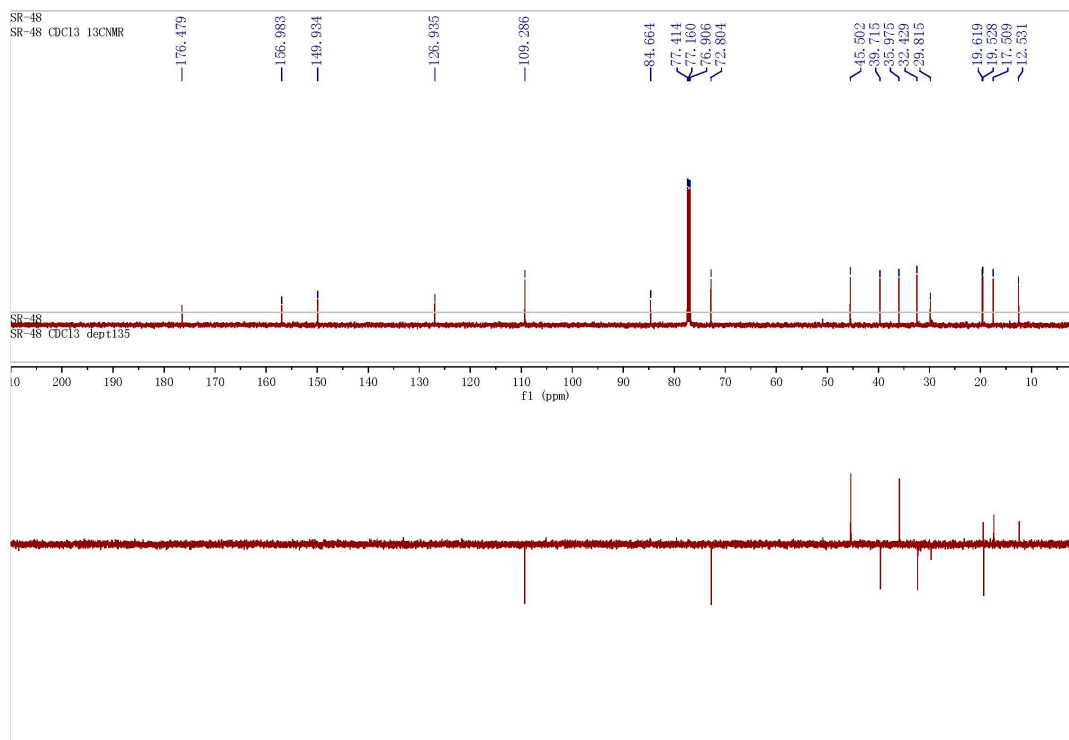**Figure S10.** HSQC spectrum of compound **2** in  $\text{CDCl}_3$ .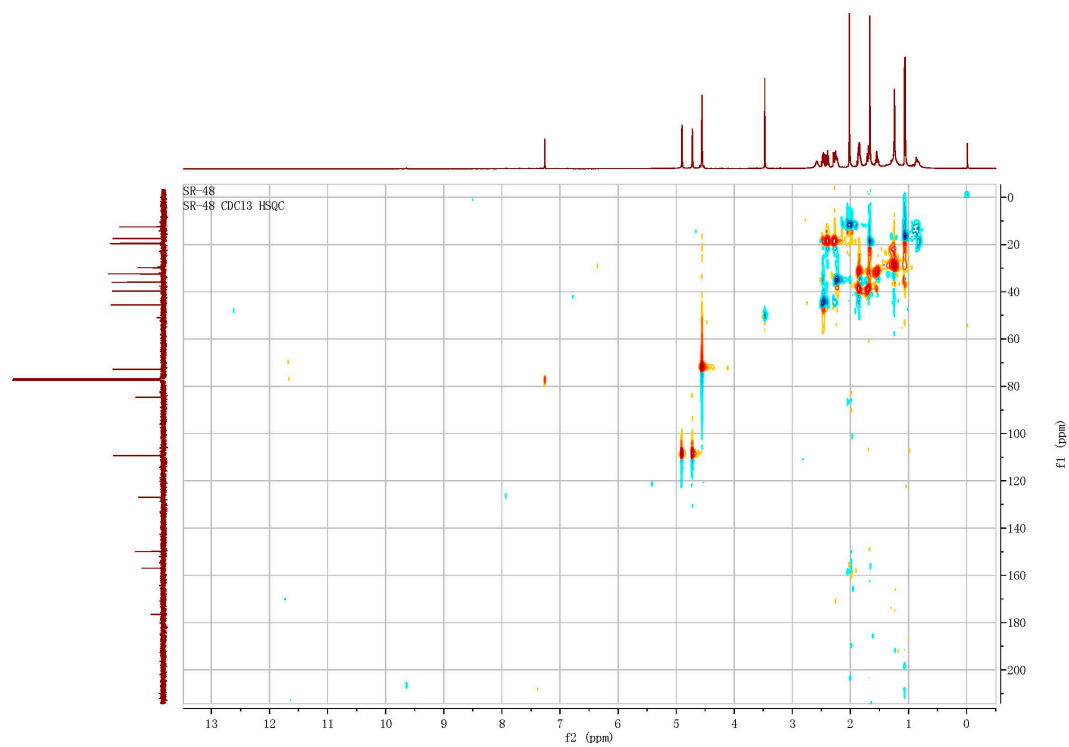

**Figure S11.** HMBC spectrum of compound **2** in CDCl<sub>3</sub>.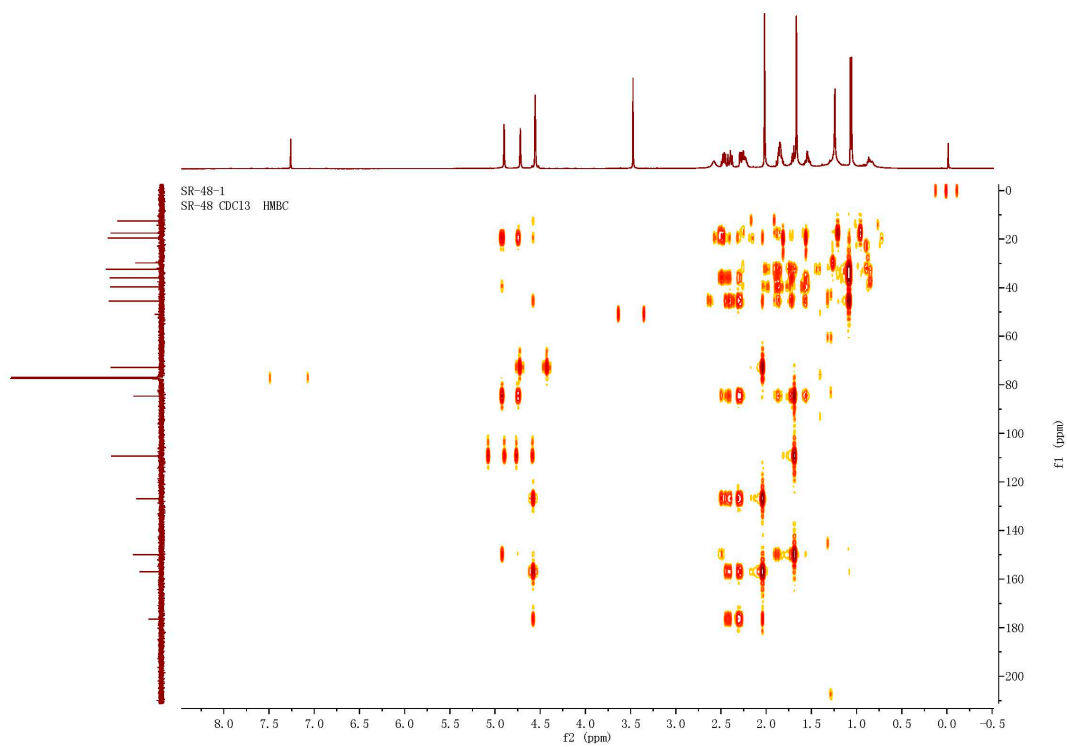**Figure S12.** <sup>1</sup>H-<sup>1</sup>H COSY spectrum of compound **2** in CDCl<sub>3</sub>.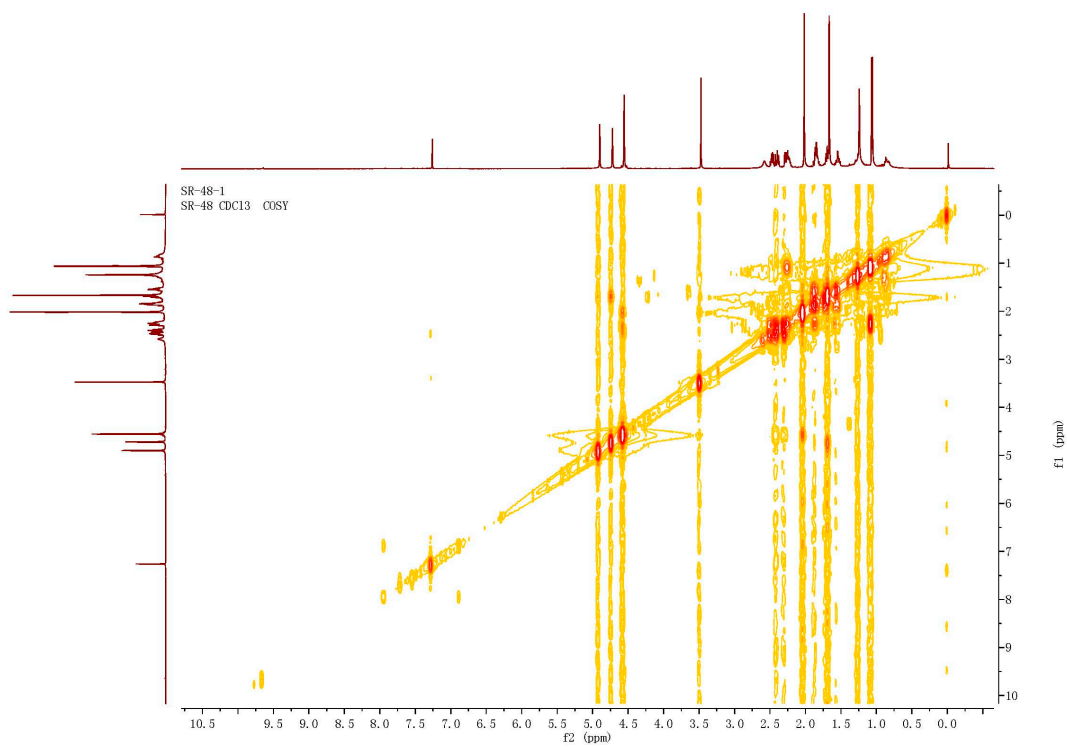

**Figure S13.** ROESY spectrum of compound **2** in CDCl<sub>3</sub>.

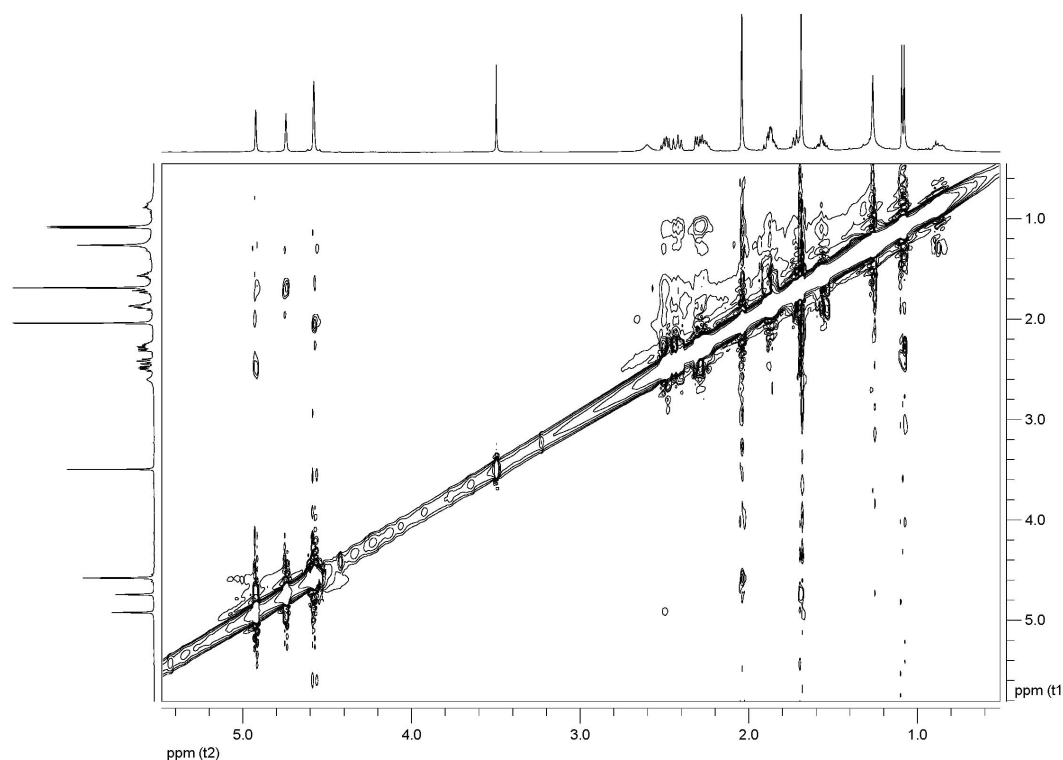

**Figure S14.** HREIMS spectrum of compound **2** in CHCl<sub>3</sub>.

Elemental Composition Report

Page 1

Single Mass Analysis

Tolerance = 10.0 PPM / DBE: min = -10.0, max = 120.0  
Selected filters: None

Monoisotopic Mass, Odd and Even Electron Ions  
13 formula(e) evaluated with 1 results within limits (up to 51 closest results for each mass)

Elements Used:  
C: 0-200 H: 0-400 O: 2-4

SR-48  
11:04:14 02-Aug-2013  
Voltage Et+

KIB  
M130802EA-09AFAMM 7 (0.643)  
250.1575

Autospec Premier  
F776  
8.89

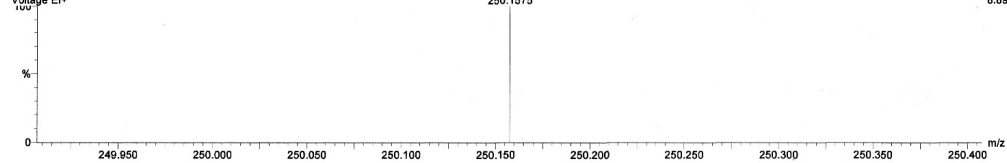

| Mass     | Calc. Mass | mDa | PPM | DBE | 1-FIT     | Formula    |
|----------|------------|-----|-----|-----|-----------|------------|
| 250.1575 | 250.1569   | 0.6 | 2.4 | 5.0 | 5546025.5 | C15 H22 O3 |
